# Supplementary material for: Single-cell RNA sequencing of aging neural progenitors reveals loss of excitatory neuron potential and a population with transcriptional immune response
Source: Front Neurosci. 2024 Aug 9;18:1400963. doi: 10.3389/fnins.2024.1400963 (PMC11341460; doi:10.3389/fnins.2024.1400963)
Supplement: Supplementary Table 1 — Grubbs' test for genes connected to inflammatory responses and markers for excitatory neurons. The sample (row title) shows the sample farthest from the mean and considered an outlier when p-value is < 0.05. [file Table_1.XLSX]

## Sheet: Sheet1
Gene	Sample	pval
Usp18	SVZ_Y_1	1.97175e-06
Oasl2	SVZ_Y_1	0.00316253
Rtp4	SVZ_Y_1	0.0512733
Lgals9	SVZ_Y_1	1.51908e-08
Ifit1	SVZ_Y_1	0.000229048
Irf7	SVZ_Y_1	5.91578e-05
Iigp1	SVZ_Y_1	0.0108775
Isg15	SVZ_Y_1	0.00130304
Ddx60	SVZ_Y_1	0.0169342
Rsad2	SVZ_Y_1	0.0285929
Gad1	SVZ_Y_4	0.0879648
Eomes	SVZ_Y_4	0.139439
Tbr1	SVZ_Y_3	0.207555
Slc17a6	SVZ_Y_5	0.185588
